# Supplementary material for: Adults of Sun Coral Tubastraea coccinea (Lesson 1829) Are Resistant to New Antifouling Biocides
Source: MDPI journal article supplement (doi:10.3390/toxics12010044), 2024-01-06
Supplement: s1 [file s1]

# Supplementary Materials: Adults of Sun Coral *Tubastraea coccinea* (Lesson 1829) Are Resistant to New Antifouling Biocides

Isabela Martins, Kátia Cristina Cruz Capel and Denis Moledo de Souza Abessa

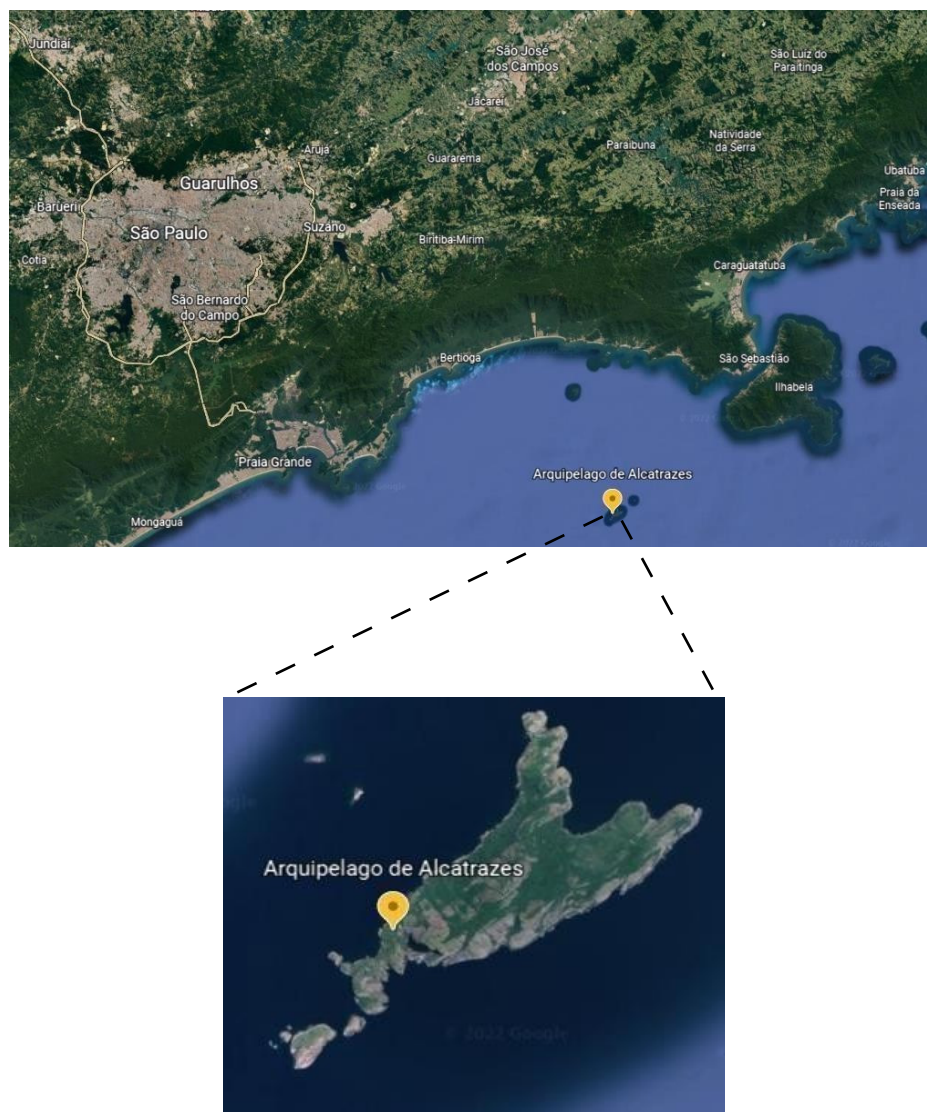

**Figure S1.** Map showing the sampling site of colonies of *Tubastraea coccinea* (sun-coral) in the Alcatrazes Archipelago, SP, Brazil. Source: Google Earth (2022).

**Table S1.** Concentration of the test-substances during the experiments with antifouling biocides and the sun-coral *Tubastraea coccinea*.

| Substance                                                                                                                                                                                                                                                                                                               |                                         |
|-------------------------------------------------------------------------------------------------------------------------------------------------------------------------------------------------------------------------------------------------------------------------------------------------------------------------|-----------------------------------------|
|                                                                                                                                                                                                                                        |                                         |
| Copyright: © 2024 by the authors. Licensee MDPI, Basel, Switzerland. This article is an open access article distributed under the terms and conditions of the Creative Commons Attribution (CC BY) license ( <a href="https://creativecommons.org/licenses/by/4.0/">https://creativecommons.org/licenses/by/4.0/</a> ). |                                         |
|                                                                                                                                                                                                                                                                                                                         | Concentrations ( $\mu\text{g L}^{-1}$ ) |
| DCOIT                                                                                                                                                                                                                                                                                                                   | 3.33                                    |
|                                                                                                                                                                                                                                                                                                                         | 10                                      |
|                                                                                                                                                                                                                                                                                                                         | 33.3                                    |
|                                                                                                                                                                                                                                                                                                                         | 100                                     |
| SiNC                                                                                                                                                                                                                                                                                                                    | 500                                     |
|                                                                                                                                                                                                                                                                                                                         | 1000                                    |
|                                                                                                                                                                                                                                                                                                                         | 2000                                    |
|                                                                                                                                                                                                                                                                                                                         | 4000                                    |
| SiNC-DCOIT                                                                                                                                                                                                                                                                                                              | 74.1                                    |
|                                                                                                                                                                                                                                                                                                                         | 222.2                                   |
|                                                                                                                                                                                                                                                                                                                         | 666.7                                   |
|                                                                                                                                                                                                                                                                                                                         | 2000                                    |
| SiNC-DCOIT-Ag                                                                                                                                                                                                                                                                                                           | 74.1                                    |
|                                                                                                                                                                                                                                                                                                                         | 222.2                                   |
|                                                                                                                                                                                                                                                                                                                         | 666.7                                   |
|                                                                                                                                                                                                                                                                                                                         | 2000                                    |

DCOIT = 4,5-dichlorine-2-n-octyl-4-isothiazole-3-one; SiNC = Silica nanocapsules (empty); SiNC-DCOIT = Silica nanocapsules charged with 4,5-dichlorine-2-n-octyl-4-isothiazole-3-one; SiNC-DCOIT-Ag = Silica nanocapsules charged with 4,5-dichlorine-2-n-octyl-4-isothiazole-3-one and coated with silver (Ag).

**Table S2.** Physicochemical parameters of test-solutions measured in the start and the end of the experiments with *Tubastraea coccinea* and new antifouling biocides. (DCOIT = 4,5-dichlorine-2-n-octyl-4-isothiazole-3-one; SiNC = Silica nanocapsules (empty); SiNC-DCOIT = Silica nanocapsules charged with 4,5-dichlorine-2-n-octyl-4-isothiazole-3-one; SiNC-DCOIT-Ag = Silica nanocapsules charged with 4,5-dichlorine-2-n-octyl-4-isothiazole-3-one and coated with silver (Ag)).

| Treatment  | Concentration<br>( $\mu\text{g L}^{-1}$ ) | Replicate<br>(n.) | pH      |       | T ( $^{\circ}\text{C}$ ) |       | D.O. (%) |       |
|------------|-------------------------------------------|-------------------|---------|-------|--------------------------|-------|----------|-------|
|            |                                           |                   | initial | final | initial                  | final | initial  | final |
| Control    | -                                         | 1                 | 7.79    | 7.90  | 23.5                     | 23.2  | 79.7     | 88.7  |
|            | -                                         | 2                 | 7.79    | 7.97  | 23.5                     | 23.2  | 80.1     | 87.8  |
|            | -                                         | 3                 | 7.74    | 7.89  | 23.5                     | 23.2  | 79.3     | 87.0  |
| DCOIT      | 3.33                                      | 1                 | 7.66    | 7.96  | 23.7                     | 22.7  | 83.3     | 89.2  |
|            | 10                                        | 1                 | 7.56    | 7.82  | 23.7                     | 23.1  | 77.9     | 93.4  |
|            | 33                                        | 3                 | 7.57    | 7.69  | 23.8                     | 22.8  | 83.8     | 94.3  |
|            | 100                                       | 3                 | 7.65    | 7.99  | 24.0                     | 23.2  | 80.1     | 97.6  |
| SiNC       | 500                                       | 1                 | 7.92    | 7.97  | 24.4                     | 23.8  | 91.7     | 97.5  |
|            | 1000                                      | 1                 | 7.94    | 8.01  | 23.5                     | 23.2  | 83.8     | 94.4  |
|            | 2000                                      | 2                 | 7.97    | 8.03  | 24.1                     | 23.3  | 89.6     | 94.4  |
|            | 4000                                      | 1                 | 7.82    | 7.98  | 24.2                     | 23.3  | 83.9     | 91.9  |
| SiNC-DCOIT | 74.1                                      | 1                 | 7.61    | 7.90  | 23.9                     | 23.8  | 75.5     | 86.1  |

|               |       |   |      |      |      |      |      |      |
|---------------|-------|---|------|------|------|------|------|------|
|               | 222.2 | 2 | 7.83 | 7.85 | 23.4 | 23.6 | 81.1 | 88.0 |
|               | 666.7 | 1 | 7.76 | 7.89 | 24.1 | 23.7 | 83.5 | 83.8 |
|               | 2000  | 1 | 7.88 | 7.98 | 23.6 | 23.8 | 84.5 | 92.6 |
| SiNC-DCOIT-Ag | 74.1  | 1 | 7.86 | 7.99 | 23.3 | 23.5 | 87.7 | 88.4 |
|               | 222.2 | 3 | 7.88 | 7.99 | 23.3 | 23.3 | 82.0 | 87.4 |
|               | 666.7 | 2 | 7.81 | 8.02 | 23.4 | 23.5 | 81.9 | 89.1 |
|               | 2000  | 3 | 7.88 | 7.99 | 23.4 | 23.4 | 85.5 | 88.7 |

**Table S3.** Raw data regarding the effects of new antifouling biocides on colonies of *Tubastraea coccinea*, for each experimental replicate.

| Treatment     | Concentration ( $\mu\text{g L}^{-1}$ ) | Replicate (n.) | Total of polyps (n.) | Tissue loss / polyp (n.) | Algae on polyps margins (Presence/Absence) |
|---------------|----------------------------------------|----------------|----------------------|--------------------------|--------------------------------------------|
| Control       | -                                      | 1              | 19                   | 3                        | Absent                                     |
|               | -                                      | 2              | 17                   | 6                        | Present                                    |
|               | -                                      | 3              | 14                   | 0                        | Present                                    |
| DCOIT         | 3.33                                   | 1              | 14                   | 1                        | Absent                                     |
|               |                                        | 2              | 17                   | 7                        | Present                                    |
|               |                                        | 3              | 15                   | 3                        | Present                                    |
|               | 10                                     | 1              | 13                   | 6                        | Present                                    |
|               |                                        | 2              | 15                   | 3                        | Present                                    |
|               |                                        | 3              | 16                   | 6                        | Absent                                     |
|               | 33                                     | 1              | 13                   | 2                        | Absent                                     |
|               |                                        | 2              | 12                   | 3                        | Present                                    |
|               |                                        | 3              | 12                   | 5                        | Present                                    |
|               | 100                                    | 1              | 13                   | 3                        | Present                                    |
|               |                                        | 2              | 20                   | 3                        | Absent                                     |
|               |                                        | 3              | 11                   | 5                        | Present                                    |
| SiNC          | 500                                    | 1              | 8                    | 0                        | Absent                                     |
|               |                                        | 2              | 17                   | 0                        | Absent                                     |
|               |                                        | 3              | 12                   | 0                        | Absent                                     |
|               | 1000                                   | 1              | 9                    | 0                        | Absent                                     |
|               |                                        | 2              | 12                   | 0                        | Absent                                     |
|               |                                        | 3              | 13                   | 0                        | Absent                                     |
|               | 2000                                   | 1              | 10                   | 0                        | Absent                                     |
|               |                                        | 2              | 7                    | 0                        | Absent                                     |
|               |                                        | 3              | 11                   | 0                        | Absent                                     |
|               | 4000                                   | 1              | 11                   | 0                        | Absent                                     |
|               |                                        | 2              | 14                   | 0                        | Absent                                     |
|               |                                        | 3              | 12                   | 0                        | Absent                                     |
| SiNC-DCOIT    | 74.1                                   | 1              | 13                   | 2                        | Present                                    |
|               |                                        | 2              | 18                   | 3                        | Present                                    |
|               |                                        | 3              | 15                   | 3                        | Absent                                     |
|               | 222.2                                  | 1              | 15                   | 7                        | Present                                    |
|               |                                        | 2              | 15                   | 8                        | Present                                    |
|               |                                        | 3              | 11                   | 6                        | Present                                    |
|               | 666.7                                  | 1              | 10                   | 2                        | Absent                                     |
|               |                                        | 2              | 12                   | 0                        | Absent                                     |
|               |                                        | 3              | 11                   | 0                        | Absent                                     |
|               | 2000                                   | 1              | 9                    | 0                        | Absent                                     |
|               |                                        | 2              | 8                    | 0                        | Absent                                     |
|               |                                        | 3              | 10                   | 1                        | Absent                                     |
| SiNC-DCOIT-Ag | 74.1                                   | 1              | 16                   | 4                        | Present                                    |
|               |                                        | 2              | 19                   | 8                        | Present                                    |
|               |                                        | 3              | 21                   | 6                        | Present                                    |

|       |   |    |    |         |
|-------|---|----|----|---------|
| 222,2 | 1 | 15 | 6  | Present |
|       | 2 | 13 | 8  | Present |
|       | 3 | 14 | 1  | Absent  |
| 666.7 | 1 | 17 | 5  | Absent  |
|       | 2 | 20 | 20 | Present |
|       | 3 | 20 | 18 | Present |
| 2000  | 1 | 19 | 7  | Present |
|       | 2 | 12 | 3  | Present |
|       | 3 | 20 | 5  | Absent  |

DCOIT = 4,5-dichlorine-2-n-octyl-4-isothiazole-3-one; SiNC = Silica nanocapsules (empty); SiNC-DCOIT = Silica nanocapsules charged with 4,5-dichlorine-2-n-octyl-4-isothiazole-3-one; SiNC-DCOIT-Ag = Silica nanocapsules charged with 4,5-dichlorine-2-n-octyl-4-isothiazole-3-one and coated with silver (Ag).

## Raw results of statistical analyses – Mortality

### DCOIT (Non parametric Kruskal-Wallis test)

H (chi2): 0

Hc (tie corrected): NAN

p (same): NAN

There is no significant difference between sample medians

### SiNC (Non parametric Kruskal-Wallis test)

H (chi2): 0,375

Hc (tie corrected): 2

p (same): 0,3679

There is no significant difference between sample medians

### SiNC-DCOIT (Non parametric Kruskal-Wallis test)

H (chi2): 0

Hc (tie corrected): NAN

p (same): NAN

There is no significant difference between sample medians

### SiNC-DCOIT-Ag (Non parametric Kruskal-Wallis test)

H (chi2): 0,38

Hc (tie corrected): 1,086

p (same): 0,5811

There is no significant difference between sample medians

## Raw results of statistical analyses – Broken polyps

### DCOIT (Non parametric Kruskal-Wallis test)

H (chi2): 0,375

Hc (tie corrected): 2

p (same): 0,3679

There is no significant difference between sample medians

### SiNC (Non parametric Kruskal-Wallis test)

H (chi2): 0,38

Hc (tie corrected): 1,086

p (same): 0,5811

There is no significant difference between sample medians

### SiNC-DCOIT (Non parametric Kruskal-Wallis test)

H (chi2): 0,38

Hc (tie corrected): 1,086

p (same): 0,5811

There is no significant difference between sample medians

### SiNC-DCOIT-Ag (Non parametric Kruskal-Wallis test)

H (chi2): 0,015

Hc (tie corrected): 0,03077

p (same): 0,9847

There is no significant difference between sample medians

## Raw results of statistical analyses – Loss of tissues of polyps

### DCOIT (One way ANOVA)

Test for equal means

|                 | Sum of sqrs | df | Mean square | F                       | p (same) |
|-----------------|-------------|----|-------------|-------------------------|----------|
| Between groups: | 1461,64     | 3  | 487,213     | 0,7011                  | 0,5693   |
| Within groups:  | 8338,86     | 12 | 694,905     | Permutation p (n=99999) |          |
| Total:          | 9800,5      | 15 | 0,9233      |                         |          |

Components of variance (only for random effects):

Var(group): -51,923 Var(error): 694,905 ICC: -0,0807534

omega2: 0

Levene's test for homogeneity of variance, from means p (same): 0,008164

Levene's test, from medians p (same): 0,5669

Welch F test in the case of unequal variances: F=0,584, df=5,33, p=0,6496

Bayes factor: 0,1828 (substantial evidence for equal means)

### SiNC (Non parametric Kruskal-Wallis test)

H (chi2): 0,05515

Hc (tie corrected): 0,09518

p (same): 0,9924

There is no significant difference between sample medians

### SiNC-DCOIT (One way ANOVA)

Test for equal means

|                 | Sum of sqrs | df | Mean square | F                       | p (same) |
|-----------------|-------------|----|-------------|-------------------------|----------|
| Between groups: | 575609      | 3  | 191870      | 0,6824                  | 0,5797   |
| Within groups:  | 3,37416E06  | 12 | 281180      | Permutation p (n=99999) |          |
| Total:          | 3,94977E06  | 15 | 0,9985      |                         |          |

Components of variance (only for random effects):

Var(group): -22327,5 Var(error): 281180 ICC: -0,0862558

omega2: 0

Levene's test for homogeneity of variance, from means p (same): 0,00894

---

Levene's test, from medians p (same): 0,5791

Welch F test in the case of unequal variances:  $F=0,5484$ ,  $df=5,357$ ,  $p=0,6694$

Bayes factor: 0,1793 (substantial evidence for equal means)



**SiNC-DCOIT-Ag (One way ANOVA)**

Test for equal means

|                 | Sum of sqrs | df | Mean square | F                       | p (same) |
|-----------------|-------------|----|-------------|-------------------------|----------|
| Between groups: | 0,538597    | 4  | 0,134649    | 2,54                    | 0,1057   |
| Within groups:  | 0,530014    | 10 | 0,0530014   | Permutation p (n=99999) |          |
| Total:          | 1,06861     | 14 | 0,09885     |                         |          |

Components of variance (only for random effects):

Var(group): 0,027216 Var(error): 0,0530014 ICC: 0,339278

omega2: 0,2912

Levene's test for homogeneity of variance, from means p (same): 0,06967

Levene's test, from medians p (same): 0,6295

Welch F test in the case of unequal variances: F=1,016, df=4,691, p=0,4832

Bayes factor: 0,9736 (no evidence for either equal or unequal means)

**Disclaimer/Publisher's Note:** The statements, opinions and data contained in all publications are solely those of the individual author(s) and contributor(s) and not of MDPI and/or the editor(s). MDPI and/or the editor(s) disclaim responsibility for any injury to people or property resulting from any ideas, methods, instructions or products referred to in the content.
